# Supplementary material
Source: HighWire-hosted journal article supplement (https://bmjopen.bmj.com/content/12/2/e055562)
Supplement: inline-supplementary-material-1 [file inline-supplementary-material-1.pdf]

Supplementary Table A. Best Subset Models for Total Cases Per Million

| Number of Variables | R <sup>2</sup> | R <sup>2</sup> (adjusted) | R <sup>2</sup> (pred) | Mallows Cp | S    | Age | Happiness | Gini | Transparency | Democracy | Urbanization | Schooling | AirPollution | HDI | Vegetable | SunShine | Undernourishment | Obesity | Cholesterol | Hypertension | Alcohol | Diabet |
|---------------------|----------------|---------------------------|-----------------------|------------|------|-----|-----------|------|--------------|-----------|--------------|-----------|--------------|-----|-----------|----------|------------------|---------|-------------|--------------|---------|--------|
| 1                   | 38.5           | 38.1                      | 36.1                  | 16.0       | 0.78 | X   |           |      |              |           |              |           |              |     |           |          |                  |         |             |              |         |        |
| 1                   | 38.5           | 38                        | 36.7                  | 16.1       | 0.78 |     |           |      |              |           |              |           |              | X   |           |          |                  |         |             |              |         |        |
| 2                   | 46.5           | 45.6                      | 43.5                  | -0.4       | 0.73 | X   |           |      |              |           |              |           |              |     |           |          |                  | X       |             |              |         |        |
| 2                   | 44.5           | 43.6                      | 41.6                  | 4.1        | 0.74 |     |           |      |              |           |              |           |              | X   |           |          |                  |         | X           |              |         |        |
| 3                   | 48.1           | 46.8                      | 44.3                  | -2.1       | 0.72 | X   |           |      |              |           |              |           |              |     | X         |          |                  | X       |             |              |         |        |
| 3                   | 47.9           | 46.7                      | 44.4                  | -1.7       | 0.72 |     |           |      |              |           |              |           |              | X   |           |          |                  | X       | X           |              |         |        |
| 4                   | 49.5           | 47.9                      | 45.2                  | -3.6       | 0.71 |     |           |      |              |           |              |           |              | X   | X         |          |                  | X       | X           |              |         |        |
| 4                   | 49.2           | 47.6                      | 44.2                  | -2.7       | 0.71 | X   |           |      |              |           |              |           |              |     | X         |          |                  | X       | X           |              |         |        |
| 5                   | 50.0           | 47.9                      | 45.1                  | -2.5       | 0.71 |     |           |      |              | X         |              |           |              | X   | X         |          |                  | X       | X           |              |         |        |
| 5                   | 49.9           | 47.9                      | 45.0                  | -2.4       | 0.71 |     |           |      |              |           |              |           |              | X   | X         |          |                  | X       | X           |              | X       |        |
| 6                   | 50.4           | 48.0                      | 44.5                  | -1.6       | 0.71 |     |           |      |              | X         |              |           |              | X   | X         |          |                  | X       | X           | X            |         |        |
| 6                   | 50.4           | 48.0                      | 44.5                  | -1.5       | 0.71 |     |           |      |              |           |              |           |              | X   | X         |          |                  | X       | X           | X            | X       |        |
| 7                   | 50.7           | 47.9                      | 44.3                  | -0.4       | 0.71 |     |           |      |              | X         |              |           |              | X   | X         |          |                  | X       | X           | X            | X       |        |
| 7                   | 50.6           | 47.8                      | 44.0                  | -0.1       | 0.71 |     |           |      |              | X         | X            |           |              | X   | X         |          |                  | X       | X           | X            |         |        |
| 8                   | 50.9           | 47.7                      | 43.8                  | 1.2        | 0.71 |     |           |      |              | X         | X            |           |              | X   | X         |          |                  | X       | X           | X            | X       |        |
| 8                   | 50.9           | 47.6                      | 43.8                  | 1.4        | 0.71 |     |           |      |              | X         |              |           | X            | X   | X         |          |                  | X       | X           | X            | X       |        |
| 9                   | 51.1           | 47.4                      | 43.3                  | 2.8        | 0.72 |     |           |      |              | X         | X            |           | X            | X   | X         |          |                  | X       | X           | X            | X       |        |
| 9                   | 51.0           | 47.3                      | 42.6                  | 3.0        | 0.72 |     |           |      | X            | X         | X            |           |              | X   | X         |          |                  | X       | X           | X            | X       |        |
| 10                  | 51.2           | 47.1                      | 42.2                  | 4.6        | 0.72 |     |           |      | X            | X         | X            |           | X            | X   | X         |          |                  | X       | X           | X            | X       |        |
| 10                  | 51.1           | 47.1                      | 42.7                  | 4.7        | 0.72 |     |           | X    |              | X         | X            |           | X            | X   | X         |          |                  | X       | X           | X            | X       |        |
| 11                  | 51.2           | 46.7                      | 41.5                  | 6.5        | 0.72 |     | X         |      | X            | X         | X            |           | X            | X   | X         |          |                  | X       | X           | X            | X       |        |
| 11                  | 51.2           | 46.7                      | 41.3                  | 6.5        | 0.72 |     |           |      | X            | X         | X            |           | X            | X   | X         |          |                  | X       | X           | X            | X       | X      |
| 12                  | 51.3           | 46.3                      | 40.7                  | 8.4        | 0.72 |     | X         |      | X            | X         | X            |           | X            | X   | X         |          |                  | X       | X           | X            | X       | X      |
| 12                  | 51.3           | 46.3                      | 40.2                  | 8.4        | 0.72 | X   | X         |      | X            | X         | X            |           | X            | X   | X         |          |                  | X       | X           | X            | X       |        |
| 13                  | 51.3           | 45.9                      | 40.0                  | 10.3       | 0.73 |     | X         | X    | X            | X         | X            |           | X            | X   | X         |          |                  | X       | X           | X            | X       | X      |
| 13                  | 51.3           | 45.9                      | 39.6                  | 10.3       | 0.73 | X   | X         | X    | X            | X         | X            |           | X            | X   | X         |          |                  | X       | X           | X            | X       |        |
| 14                  | 51.4           | 45.5                      | 38.6                  | 12.2       | 0.73 | X   | X         | X    | X            | X         | X            |           | X            | X   | X         |          |                  | X       | X           | X            | X       | X      |
| 14                  | 51.4           | 45.5                      | 38.6                  | 12.2       | 0.73 |     | X         | X    | X            | X         | X            |           | X            | X   | X         | X        |                  | X       | X           | X            | X       | X      |
| 15                  | 51.4           | 45.1                      | 37.7                  | 14.1       | 0.73 | X   |           | X    | X            | X         | X            | X         | X            | X   | X         |          | X                | X       | X           | X            | X       | X      |
| 15                  | 51.4           | 45.1                      | 37.4                  | 14.1       | 0.73 | X   | X         | X    | X            | X         | X            | X         | X            | X   | X         |          |                  | X       | X           | X            | X       | X      |
| 16                  | 51.4           | 44.6                      | 37.0                  | 16.0       | 0.73 | X   | X         | X    | X            | X         | X            | X         | X            | X   | X         |          | X                | X       | X           | X            | X       | X      |
| 16                  | 51.4           | 44.6                      | 35.7                  | 16.0       | 0.73 | X   | X         | X    | X            | X         | X            | X         | X            | X   | X         | X        |                  | X       | X           | X            | X       | X      |
| 17                  | 51.4           | 44.1                      | 35.3                  | 18.0       | 0.74 | X   | X         | X    | X            | X         | X            | X         | X            | X   | X         | X        | X                | X       | X           | X            | X       | X      |

139 cases used; 31 cases contain missing values.
