# Supplementary material
Source: HighWire-hosted journal article supplement (https://bmjopen.bmj.com/content/12/2/e055562)
Supplement: inline-supplementary-material-2 [file inline-supplementary-material-2.pdf]

Supplementary Table B. Best Subset Models for Total Deaths Per Million

| Number of Variables | R <sup>2</sup> | R <sup>2</sup> (adj) | R <sup>2</sup> (pred) | Mallows Cp | S    | Age | Happiness | Gini | Transparency | Democracy | Urbanization | Schooling | AirPollution | HDI | Vegetable | SunShine | Undernourishment | Obesity | Cholesterol | Hypertension | Alcohol | Diabet |
|---------------------|----------------|----------------------|-----------------------|------------|------|-----|-----------|------|--------------|-----------|--------------|-----------|--------------|-----|-----------|----------|------------------|---------|-------------|--------------|---------|--------|
| 1                   | 35.6           | 35.1                 | 33.2                  | 28.1       | 0.86 | X   |           |      |              |           |              |           |              |     |           |          |                  |         |             |              |         |        |
| 1                   | 30.5           | 30.0                 | 28.6                  | 40.3       | 0.89 |     |           |      |              |           |              |           |              | X   |           |          |                  |         |             |              |         |        |
| 2                   | 42.3           | 41.4                 | 39.3                  | 13.8       | 0.81 | X   |           |      |              |           |              |           |              |     |           |          | X                |         |             |              |         |        |
| 2                   | 41.4           | 40.5                 | 38.9                  | 16.0       | 0.82 |     |           |      |              |           |              |           |              |     | X         |          | X                |         |             |              |         |        |
| 3                   | 45.6           | 44.3                 | 41.9                  | 7.9        | 0.79 |     |           |      |              |           |              |           |              |     | X         |          | X                |         | X           |              |         |        |
| 3                   | 45.4           | 44.1                 | 41.8                  | 8.4        | 0.79 | X   |           |      |              |           |              |           |              |     | X         |          | X                |         |             |              |         |        |
| 4                   | 48.4           | 46.7                 | 43.8                  | 3.3        | 0.78 | X   |           | X    |              |           |              |           |              |     | X         |          | X                |         |             |              |         |        |
| 4                   | 46.9           | 45.2                 | 42.6                  | 6.8        | 0.79 |     |           | X    |              |           |              |           |              |     | X         |          | X                |         | X           |              |         |        |
| 5                   | 49.7           | 47.6                 | 44.5                  | 2.2        | 0.77 | X   | X         | X    |              |           |              |           |              |     | X         |          | X                |         |             |              |         |        |
| 5                   | 49.1           | 47.1                 | 43.9                  | 3.4        | 0.77 | X   |           | X    | X            |           |              |           |              |     | X         |          | X                |         |             |              |         |        |
| 6                   | 50.5           | 48.1                 | 45.0                  | 2.1        | 0.77 | X   | X         | X    |              |           |              |           |              |     | X         | X        | X                |         |             |              |         |        |
| 6                   | 50.3           | 47.9                 | 44.1                  | 2.6        | 0.77 | X   | X         | X    |              |           |              |           |              |     | X         |          | X                |         | X           |              |         |        |
| 7                   | 51.2           | 48.4                 | 44.7                  | 2.5        | 0.76 | X   | X         | X    |              |           |              |           |              |     | X         | X        | X                |         | X           |              |         |        |
| 7                   | 51.1           | 48.3                 | 44.8                  | 2.7        | 0.76 | X   | X         | X    |              | X         |              |           |              |     | X         | X        | X                |         |             |              |         |        |
| 8                   | 51.6           | 48.4                 | 45.2                  | 3.5        | 0.76 | X   | X         | X    |              |           | X            |           |              |     | X         | X        | X                |         |             |              | X       |        |
| 8                   | 51.5           | 48.3                 | 44.4                  | 3.7        | 0.76 | X   | X         | X    | X            |           |              |           |              |     | X         | X        | X                |         | X           |              |         |        |
| 9                   | 52.0           | 48.4                 | 44.8                  | 4.6        | 0.76 | X   | X         | X    |              | X         | X            |           |              |     | X         | X        | X                |         |             |              | X       |        |
| 9                   | 51.9           | 48.3                 | 44.5                  | 4.8        | 0.76 | X   | X         | X    |              |           | X            |           |              |     | X         | X        | X                |         | X           | X            |         |        |
| 10                  | 52.3           | 48.3                 | 44.4                  | 5.9        | 0.76 | X   | X         | X    | X            | X         | X            |           |              |     | X         | X        | X                |         |             |              | X       |        |
| 10                  | 52.2           | 48.2                 | 44.1                  | 6.1        | 0.76 | X   | X         | X    | X            |           | X            |           |              |     | X         | X        | X                |         | X           | X            |         |        |
| 11                  | 52.5           | 48.1                 | 44.1                  | 7.4        | 0.77 | X   | X         | X    | X            | X         | X            |           | X            |     | X         | X        | X                |         |             |              | X       |        |
| 11                  | 52.4           | 48.0                 | 43.8                  | 7.5        | 0.77 | X   | X         | X    | X            |           | X            |           | X            |     | X         | X        | X                |         | X           | X            |         |        |
| 12                  | 52.7           | 47.9                 | 43.4                  | 8.8        | 0.77 | X   | X         | X    | X            | X         | X            |           | X            |     | X         | X        | X                |         | X           | X            |         |        |
| 12                  | 52.6           | 47.8                 | 42.8                  | 9.0        | 0.77 | X   | X         | X    | X            |           | X            | X         | X            | X   | X         | X        | X                |         | X           | X            |         |        |
| 13                  | 52.9           | 47.6                 | 42.4                  | 10.5       | 0.77 | X   | X         | X    | X            | X         | X            |           | X            | X   | X         | X        | X                |         | X           | X            |         |        |
| 13                  | 52.8           | 47.6                 | 42.5                  | 10.5       | 0.77 | X   | X         | X    | X            | X         | X            |           | X            |     | X         | X        | X                |         | X           | X            | X       |        |
| 14                  | 53.0           | 47.3                 | 41.4                  | 12.2       | 0.77 | X   | X         | X    | X            | X         | X            |           | X            | X   | X         | X        | X                |         | X           | X            | X       |        |
| 14                  | 52.9           | 47.2                 | 41.1                  | 12.4       | 0.77 | X   | X         | X    | X            | X         | X            |           | X            | X   | X         | X        | X                | X       | X           | X            | X       |        |
| 15                  | 53.0           | 46.9                 | 40.1                  | 14.1       | 0.77 | X   | X         | X    | X            | X         | X            |           | X            | X   | X         | X        | X                | X       | X           | X            | X       | X      |
| 15                  | 53.0           | 46.8                 | 40.8                  | 14.2       | 0.77 | X   | X         | X    | X            | X         | X            |           | X            | X   | X         | X        | X                |         | X           | X            | X       | X      |
| 16                  | 53.0           | 46.5                 | 39.5                  | 16.0       | 0.78 | X   | X         | X    | X            | X         | X            |           | X            | X   | X         | X        | X                | X       | X           | X            | X       | X      |
| 16                  | 53.0           | 46.4                 | 39.4                  | 16.1       | 0.78 | X   | X         | X    | X            | X         | X            | X         | X            | X   | X         | X        | X                | X       | X           | X            | X       | X      |
| 17                  | 53.1           | 46.0                 | 38.8                  | 18.0       | 0.78 | X   | X         | X    | X            | X         | X            | X         | X            | X   | X         | X        | X                | X       | X           | X            | X       | X      |

139 cases used; 31 cases contain missing values.
